RESEARCH ARTICLE

# The prognostic and clinicopathologic characteristics of CD147 and esophagus cancer: A meta-analysis

Hui Li<sup>1</sup>\*, Chunxiang Jiang<sup>2</sup>\*, Dongwen Wu<sup>2</sup>\*, Shupeng Shi<sup>2</sup>, Mengting Liao<sup>3</sup>, Jing Wang<sup>2</sup>, Yanwen Li<sup>2</sup>, Zihao Xu<sup>2</sup>

**1** Reproductive Department, Xiangya Hospital, Central South University, Changsha, China, **2** Xiangya School of Medicine, Central South University, Changsha, China, **3** Oncology department of Xiangya Hospital, Central South University, Changsha, China

\* These authors contributed equally to this work.

\* [HUILI257@hotmail.com](mailto:HUILI257@hotmail.com)

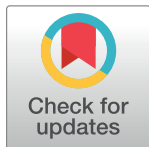

## Abstract

### Objective

The prognostic significance of CD147 expression in esophageal cancer patients remains controversial. Using a meta-analysis, we investigated the prognostic and clinicopathologic characteristics of CD147 in esophageal cancer.

### Methods

A comprehensive literature search of the PubMed (1966–2016), EMBASE (1980–2016), Cochrane Library (1996–2016), Web of Science (1945–2016), China National Knowledge Infrastructure (1982–2016), and Wanfang databases (1988–2016) was performed to identify studies of all esophageal cancer subtypes. Correlations between CD147 expression and survival outcomes and clinicopathological features were analyzed using meta-analysis methods.

### Results

Seventeen studies were included. High CD147 expression reduced the 3-year survival rate (OR = 3.26, 95% CI = (1.53, 6.93),  $p = 0.02$ ) and 5-year survival rate (OR = 4.35, 95% CI = (2.13, 8.90),  $p < 0.0001$ ). High CD147 expression reduced overall survival in esophageal cancer (HR = 1.60, 95% CI = (1.19, 2.15),  $p = 0.02$ ). Additionally, higher CD147 expression was detected in esophageal cancer tissues than noncancerous tissues (OR = 9.45, 95% CI = (5.39, 16.59),  $p < 0.00001$ ), normal tissues (OR = 12.73, 95% CI = (3.49, 46.46),  $p = 0.0001$ ), para-carcinoma tissues (OR = 12.80, 95% CI = (6.57, 24.92),  $p < 0.00001$ ), and hyperplastic tissues (OR = 3.27, 95% CI = (1.47, 7.29),  $p = 0.004$ ). CD147 expression was associated with TNM stage (OR = 3.66, 95% CI = (2.20, 6.09),  $p < 0.00001$ ), tumor depth (OR = 7.97, 95% CI = (4.13, 15.38),  $p < 0.00001$ ), and lymph node status (OR = 5.14, 95% CI = (2.03, 13.01),  $p = 0.0005$ ), but not with tumor differentiation, age, or sex.

## OPEN ACCESS

**Citation:** Li H, Jiang C, Wu D, Shi S, Liao M, Wang J, et al. (2017) The prognostic and clinicopathologic characteristics of CD147 and esophagus cancer: A meta-analysis. PLoS ONE 12 (7): e0180271. <https://doi.org/10.1371/journal.pone.0180271>

**Editor:** Hiromu Suzuki, Sapporo Ika Daigaku, JAPAN

**Received:** September 12, 2016

**Accepted:** June 13, 2017

**Published:** July 11, 2017

**Copyright:** © 2017 Li et al. This is an open access article distributed under the terms of the [Creative Commons Attribution License](https://creativecommons.org/licenses/by/4.0/), which permits unrestricted use, distribution, and reproduction in any medium, provided the original author and source are credited.

**Data Availability Statement:** All relevant data are within the paper and its Supporting Information files.

**Funding:** The author(s) received no specific funding for this work.

**Competing interests:** The authors have declared that no competing interests exist.

## Conclusion

Our meta-analysis suggests that CD147 is an efficient prognostic factor in esophageal cancer. High CD147 expression in patients with esophageal cancer was associated with worse survival outcomes and common clinicopathological indicators of poor prognosis.

## Introduction

Esophagus cancer (EC) is a malignant disease with the eighth incidence rate and the sixth mortality rate worldwide [1, 2]. The prognosis of EC is unfavorable, largely due to its unapparent symptom at the early stage and tumor infiltration and metastasis which makes it hard to completely remove the tumor by surgery [3]. Therefore, it is with great significance to study the molecular mechanism in the development, invasion and metastasis of EC. Up to now, it is proved that the expression of some molecules, such as NF-kappaB, MIF, CXCR4 and EGFR, are related to the treatment or the prognosis of EC [4–6].

CD147, also named extracellular matrix (ECM) metalloproteinase inducer, is a molecule highly expressed on the surface of cancer cells and promotes the secretion of matrix metalloproteinases (MMPs) from fibroblasts, degrading the matrix of cancer cell and thus facilitating the invasion and metastasis of cancer [7, 8]. Numerous papers showed that CD147 plays an important role in different sorts of cancer, including bladder cancer, prostate cancer, ovarian cancer, glioma, and esophageal cancer is also one of them [9–14].

Although evidence exists that CD147 is an important factor implicated in clinicopathological features and the prognosis of EC. Some conflicting results have been reported. Wan and Wu [15] reported the CD147 expression wasn't associated with overall survival (OS), which contradictory with Zhu et al [16]. Some studies found that CD147 high Expression might be related to advanced clinical stage and lymph node metastasis [15, 17]. But other studies reported that there was no significant difference between CD147 and clinical stage and lymph node metastasis [17, 18]. Moreover, there are also arguments about relationship of the CD147 high expression with invasive depth, histological differentiation [16, 18–20].

This controversial issue could be results of differences in sample sizes and other factors, such as the criteria of the CD147 high expression, and unfortunately evidence-based confirmation by large-scale clinical trials is still lacking. Therefore, we conducted this meta-analysis to quantitatively inspect the relationship between CD147 and clinicopathological features and survival of EC patients.

## Methods and materials

### Search strategy

We searched PubMed (1966–2016), EMBASE (1980–2016), the Cochrane Library (1996–2016), Web of Science (1945–2016), China National Knowledge Infrastructure (1982–2016), and the WanFang databases (1988–2016). The studies were restricted to humans, but not restricted by date, language, or publication status. The following combined search term was used: (Esophageal Cancer, esophageal carcinoma, esophageal neoplasms, carcinoma of esophagus, esophageal tumor, Malignant Neoplasm of Oesophagus) AND (CD147, (extracellular AND matrix AND metalloproteinase AND inducer), extracellular MMP inducer, EMMPRIN, BSG) to identify relevant papers addressing all subtypes of esophageal cancer. We combined the term appropriately with MeSH Terms and used an appropriate adjustment for different databases. Details of the search strategies can be found in [S1 File](#).

## Criteria for including studies

1. Published or unpublished case control study or cohort study in English or Chinese with the full text available;
2. All cases had survival or clinical pathological characteristic data, without radiotherapy or chemotherapy or biological therapy before sampling;
3. Diagnosis of esophagus cancer was proven by pathological methods;
4. Studies of CD147 expression based on primary esophagus cancer tissues, rather than serum or any other kinds of indirect specimen were included;
5. The best quality study was retained for dealing duplicated studies.

## Criteria for excluding studies

1. Cell or animal studies, case reports, letters, reviews;
2. The standard of pathological diagnosis was not clear.

## Assessment of included studies

The Newcastle-Ottawa quality assessment scale of case control studies (NOS)[21] was adopted to assess the quality of included studies, which has three categories (selection, comparability, and exposure) and eight items. The quality assessment values ranged from 0 to 9 stars. Studies scored more than 6 stars was included for our analysis.

## Statistical analysis

Records were independently scanned by two authors to exclude apparent irrelevant studies. Then, full text were independently reviewed by two authors, and controversial opinions about whether to include specific study were resolved by discussion. Data was extracted independently by two authors: Hui Li and Chunxiang Jiang. Excel was designed according to the Cochrane manual to extract data and the survival data from the Kaplan-Meier curve was obtained by using Engauge Digitizer software. The software Revman 5.3 and Stata 13.0 were applied to analyze the data. Results were showed with odds ratios (OR) or HR (hazard ratio) and 95% confidence intervals (95% CI). Fixed-effects model was adopted when there was no evidence of significant heterogeneity ( $p > 0.1$  and  $I^2 < 50\%$ ); otherwise, random-effects model was used. If possible, heterogeneity was explored and subgroup analyses were performed. All  $p$  values were 2-sided, and  $p < 0.05$  was considered significant.

Sensitivity analysis was also performed to evaluate the influence of individual study on the final effect if the parameter has more than two data sets, and different model was used for no more than two data sets.

Begg's test was used to assess publication bias ( $p < 0.05$  was considered statistically significant). If publication bias was confirmed, a trim-and-fill method developed by Duval and Tweedie[22] was implemented to adjust for this bias. Then, we replicated the funnel plot with their "missing" counterparts around the adjusted summary estimate.

## Results

### Literature search

The literature searches revealed 64 studies, of which 21 studies were excluded owing to duplication. After reading the titles and abstracts, 20 studies were excluded. The full-length texts of

23 candidate studies were carefully reviewed (animal studies [ $n = 5$ ]; review and meta-analysis [ $n = 2$ ]; no control group [ $n = 2$ ]). Finally, 17 trials were included in the quantitative analysis (Fig 1). Only Huang et al.[7] reported CD147 expression in type II/III adenocarcinoma of the esophagogastric junction (Type II/III AEGs). An association between CD147 and esophageal squamous cell carcinoma (ESCC) was reported in 16 studies.

## Qualitative assessment

Study quality was assessed using the Newcastle–Ottawa quality assessment scale; scores ranged from 7 to 8 (with a mean of 7.35), and higher values indicated better methodology. The quality assessment results are shown in S1 Table and detailed information for this analysis is provided in Table 1.

## CD147 and survival analysis

**CD147 expression and overall survival.** We analyzed the relationship between CD147 expression and overall survival in EC patients based on the results of two studies[9, 15]. Wan and Wu[15] used Kaplan–Meier survival curves and Zhu et al.[9] used Cox regression analyses. In both studies, high CD147 expression was related to poor OS. As shown in Fig 2A, the data did not exhibit heterogeneity ( $p = 0.23$ ,  $I^2 = 30.1\%$ ), and the fixed effects model showed that the combined HR was 1.60 (95% CI = (1.19, 2.15),  $p = 0.02$ ).

**Impact of CD147 on 3-year survival rate of EC.** Two reports[7, 15] including a total of 154 patients reported an association between CD147 expression and the 3-year survival rate. Huang et al.[7] detected CD147 expression in Type II/III AEGs, and Wan and Wu[15] observed CD147 expression in ESCC. Without heterogeneity ( $p = 0.61$ ,  $I^2 = 0\%$ ), a fixed-effects model showed that high CD147 expression (57.95%) was statistically significantly associated with a lower 3-year survival rate than that of low expression (81.82%) (OR = 3.26, 95% CI = (1.53, 6.93),  $p = 0.02$ ) (Fig 2B).

**Impact of CD147 on the 5-year survival rate of EC.** The association between CD147 and the 5-year survival rate of EC was reported in two studies[7, 15]. Both Huang et al.[7] (OR = 4.0, 95% CI = (1.46, 10.95)) and Wan and Wu[15] (OR = 4.75, 95% CI = (1.72, 13.13)) showed that high CD147 expression is statistically significantly associated with a lower 5-year survival rate. Without heterogeneity ( $p = 0.81$ ,  $I^2 = 0\%$ ), a significant difference in the 5-year survival rate was detected between groups with high CD147 expression (29.55%) and low CD147 expression (62.12%) assuming a fixed-effects model (OR = 4.35, 95% CI = (2.13, 8.90),  $p < 0.0001$ ) (Fig 2C).

**CD147 expression and disease-free survival (DFS).** Ishibashi et al.[17] reported an association between CD147 and DFS. The risk was 1.5 times higher for the high CD147 expression group than the low CD147 expression group (HR = 4.6, 95% CI = 1.55, 13.4),  $p = 0.006$ ). The pooled HR for DFS showed that high expression of CD147 reduced DFS in EC.

## CD147 expression in different EC tissues

**CD147 in esophageal cancer and noncancerous tissues.** CD147 expression in esophageal cancer and noncancerous tissues was investigated in 14 studies[7, 15, 17–20, 23–30] including 1544 patients. With significant heterogeneity ( $p < 0.00001$ ,  $I^2 = 77\%$ ), a random-effects model showed that CD147 expression in esophageal cancer (72.83%) was higher than that in noncancerous tissues (29.19%) (OR = 9.45, 95% CI = (5.39, 16.59),  $p < 0.00001$ ) (Fig 3A).

**CD147 in esophageal cancer and normal esophageal tissues.** Five trials[18, 20, 24, 29, 30] reported the expression of CD147 in esophageal cancer tissues and normal esophageal cancer tissues, including 302 esophageal cancer tissues and 91 normal esophageal cancer tissues.

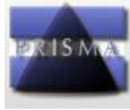

PRISMA 2009 Flow Diagram

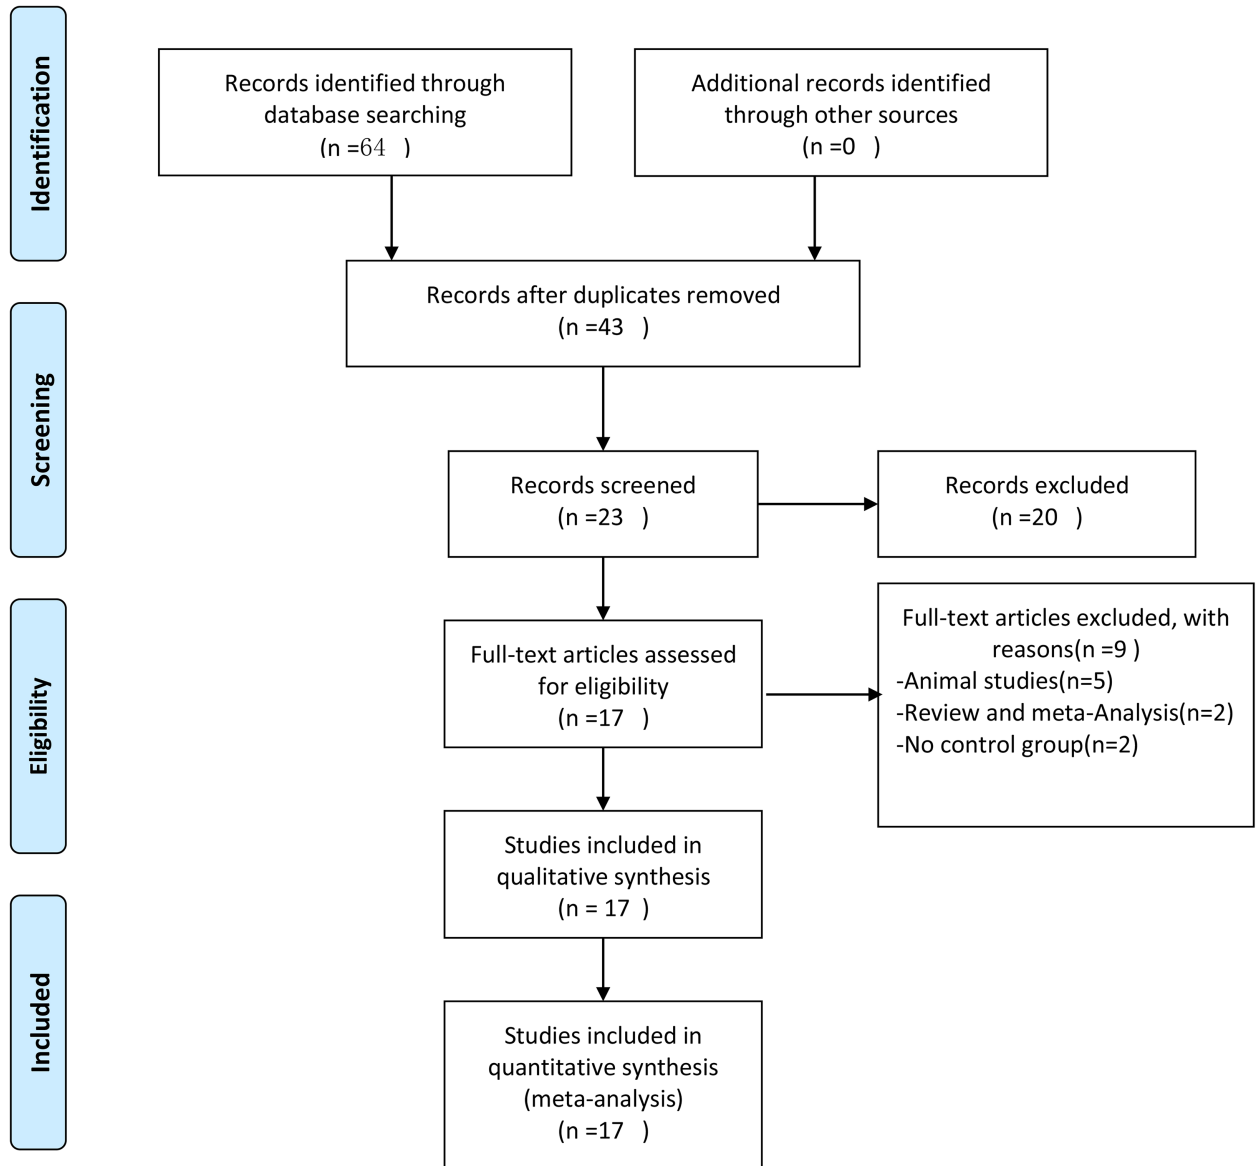

From: Moher D, Liberati A, Tetzlaff J, Altman DG, The PRISMA Group (2009). Preferred Reporting Items for Systematic Reviews and Meta-Analyses: The PRISMA Statement. PLoS Med 6(7): e1000097. doi:10.1371/journal.pmed1000097

For more information, visit [www.prisma-statement.org](http://www.prisma-statement.org).

**Fig 1. Flowchart of selection of studies for inclusion in meta-analysis.** A total of 64 studies were identified, and 21 studies were excluded because of duplication. After reading the titles and abstracts, 20 studies were excluded. 23 possible full text studies were carefully reviewed (animal studies [n = 5]; review and meta-analysis [n = 2]; no control group [n = 2]). Finally, 17 trials were included for quantitative analysis.

<https://doi.org/10.1371/journal.pone.0180271.g001>

With significant heterogeneity ( $p = 0.02$ ,  $I^2 = 66\%$ ), a random-effects model showed that CD147 expression was higher in esophageal cancer tissues (78.48%) than in normal tissues (28.57%) (OR = 12.73, 95%CI = (3.49, 46.46),  $p = 0.0001$ ) (Fig 3B).

**CD147 in esophageal cancer and para-carcinoma tissues.** Eleven trials [7, 15, 17–19, 23, 25–28, 30] investigated the expression of CD147 in esophageal cancer tissues and para-carcinoma tissues, including 700 esophageal cancer tissues and 539 para-carcinoma tissues. A random-effects model showed that CD147 expression was higher in esophageal cancer tissues (71.29%) than in para-carcinoma tissues (17.63%) (OR = 12.80, 95% CI = (6.57, 24.92),  $p < 0.00001$ ) with significant heterogeneity ( $p < 0.0001$ ,  $I^2 = 75\%$ ) (Fig 3C).

**CD147 in esophageal cancer and hyperplastic tissues.** Three trials [17, 18, 29] reported the expression of CD147 in esophageal cancer tissues and hyperplastic tissues, including 273 esophageal cancer tissues and adjacent hyperplastic tissues. A random-effects model showed a difference in the rate of high CD147 expression between the two groups (OR = 3.27, 95% CI = (1.47, 7.29),  $p = 0.004$ ) with heterogeneity ( $I^2 = 59\%$ ,  $p = 0.09$ ) (Fig 3D).

### Correlation of CD147 with clinicopathological parameters

**Correlation between CD147 and TNM stage of esophageal cancer tissues.** TNM stage is an international standard for tumor staging. TNM stage I–II has a better prognosis than TNM stage III–IV in EC. The association between CD147 and TNM stage was investigated in five studies [7, 15, 18, 23, 29]. A fixed-effects model was used without heterogeneity ( $p = 0.13$ ,  $I^2 = 44\%$ ); it

**Table 1. Characteristics of eligible studies.**

| First Author     | Year | Origin | Median age | sample size | CD147 distribution | Type of cancer   | Counting method | Definition of CD147 positive                                   | NOS score |
|------------------|------|--------|------------|-------------|--------------------|------------------|-----------------|----------------------------------------------------------------|-----------|
| Yoshio Ishibashi | 2004 | Japan  | 61         | 101         | -                  | ESCC             | -               | No staining, partial staining, and diffuse and strong staining | 8         |
| Zhao JH          | 2004 | China  | 54.6       | 70          | M and C            | ESCC             | A and B         | >0% or weak intensity                                          | 7         |
| Cheng, M. F      | 2006 | Taiwan | 62.5       | 41          | M and C            | ESCC             | A and B         | >0% or weak intensity                                          | 7         |
| Zhang HZ         | 2006 | China  | 58         | 85          | M                  | ESCC             | B               | Brown                                                          | 7         |
| Xiong SongBai    | 2007 | China  | 55.6       | 57          | M and C            | ESCC             | A and B         | >0% or weak intensity                                          | 7         |
| Xie L            | 2008 | China  | 53.2       | 87          | M and C            | ESCC             | A and B         | >5% or weak intensity                                          | 7         |
| Qi Bo            | 2008 | China  | 58.2       | 52          | C                  | ESCC             | A and B         | >0% or weak intensity                                          | 8         |
| Ma Guang         | 2009 | China  | 59.5       | 70          | M and C            | ESCC             | A and B         | A+B>3                                                          | 8         |
| Chen JX          | 2009 | China  | 42         | 50          | M and C            | ESCC             | A and B         | >10% or weak intensity                                         | 7         |
| Liu HaiMing      | 2010 | China  | -          | 19          | M and C            | ESCC             | A               | >10%                                                           | 7         |
| Xiao XiangZhi    | 2011 | China  | 50         | 60          | M and C            | ESCC             | A and B         | A2*B>1                                                         | 7         |
| Zhu ShaoJun      | 2011 | China  | -          | 108         | M and C            | ESCC             | A               | >5%                                                            | 7         |
| Xiong LN         | 2011 | China  | -          | 40          | M and C            | ESCC             | A               | >5%                                                            | 8         |
| Zhu, S           | 2011 | China  | -          | 86          | M and C            | ESCC             | A               | >5%                                                            | 7         |
| Wan, Y           | 2012 | China  | 58.8       | 80          | M                  | ESCC             | A and B         | A3*B≥5                                                         | 8         |
| Li ChangXiu      | 2013 | China  | 63.4       | 60          | M and C            | ESCC             | A and B         | A4*B≥5                                                         | 7         |
| Huang, L         | 2015 | China  | 62.2       | 74          | M and C            | Type II/III AEGs | A and B         | A3*B≥3                                                         | 8         |

Positive cell percentage (A). A1:0 point for positive cell percentage ≤ 25%; 1 point for 26%-50%; 2 points for 51%-75%; 3 points for >75%. A2: point for positive cell percentage < 5%; 1 point for 5%-25%; 2 points for 26%-50%; 3 points for >50%. A3: 0 point for positive cell percentage ≤ 5%, 1 point for 6%-25%, 2 points for 26%-50%, 3 points for 51%-75%, and 4 points for >75%. A4: point for positive cell percentage < 1%; 1 point for 1%-10%; 2 points for 11%–50%; 3 points for ≥ 51%. Staining intensity (B): 0 point for basically no coloration, 1 point for light yellow, 2 points for pale brown, and 3 points for dark brown. M: Membrane, C: Cytoplasm. ESCC: esophageal squamous cell carcinoma. Type II/III AEGs: type II/III adenocarcinoma of esophagogastric junction.

<https://doi.org/10.1371/journal.pone.0180271.t001>

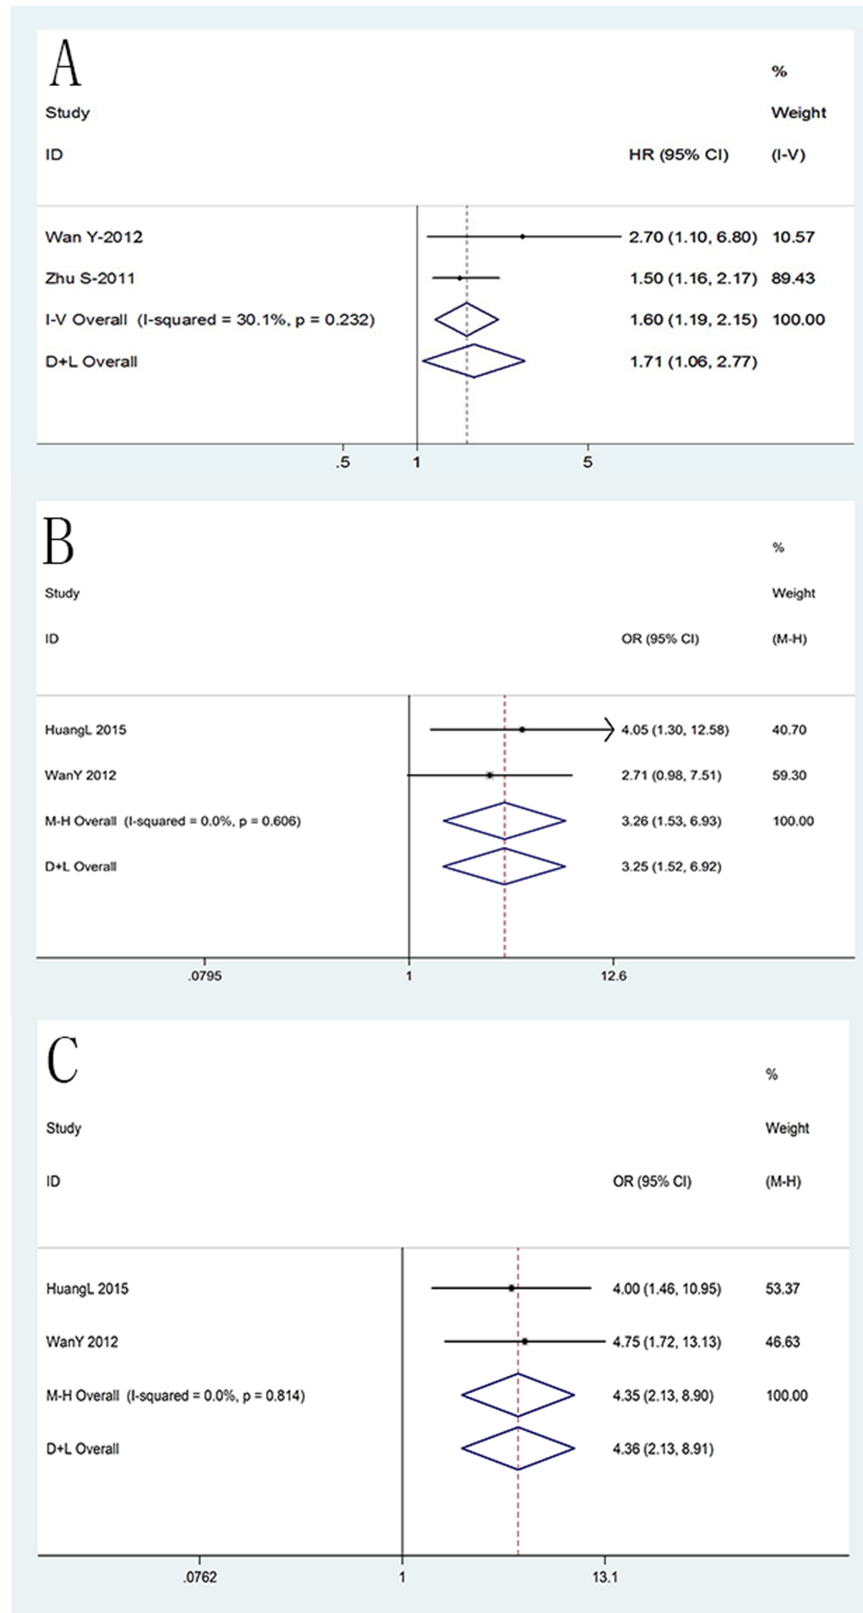

**Fig 2. Survival analysis forest plot.** The squares and horizontal lines correspond to the study-specific OR and 95%CI. The area of the squares reflects the study-specific weight (inverse of the variance). The diamonds

represent the pooled OR and 95% CI. The solid vertical line is at the null value (OR = 1). **A** The relationship between CD147 expression and overall survival. CD147 expression was associated with overall survival (HR = 1.60, 95% CI = (1.19, 2.15),  $p = 0.02$ ). **B** The relationship between CD147 expression and 3-year survival rate. CD147 expression was associated with 3-year survival rate (OR = 3.26, 95%CI = (1.53,6.93),  $p = 0.02$ ). **C** The relationship between CD147 expression and 5-year survival rate. CD147 expression was associated with 5-year survival rate (OR = 4.35, 95%CI = (2.13, 8.90),  $p < 0.0001$ ).

<https://doi.org/10.1371/journal.pone.0180271.g002>

indicated a significant difference between the TNM stage III–IV group (83.87%) and TNM stage I–II group (59.17%) (OR = 3.66, 95% CI = (2.20, 6.09),  $p < 0.00001$ ) (Fig 4A).

**CD147 with invasive depth of esophageal cancer tissues.** Nine studies [15, 16, 18–20, 26–28, 31] including 622 tissue samples investigated the relationship between CD147 expression and depth of tumor invasion. With significant heterogeneity ( $p = 0.07$ ,  $I^2 = 45\%$ ), a random-effects model showed a significant difference between the pt3/pt4 group (79.44%) and pt1/pt2 group (34.71%) (OR = 7.97, 95% CI = (4.13, 15.38),  $p < 0.00001$ ) (Fig 4B).

**CD147 with lymph node metastasis of esophageal cancer tissues.** Prognosis is often not good when esophageal cancer patients develop lymph node metastasis; accordingly, it is very important to identify indicators of metastasis at an early stage. Thirteen studies [7, 15, 16, 18–20, 23, 25–29, 31] that examined metastasis were included. With significant heterogeneity ( $p < 0.00001$ ,  $I^2 = 83\%$ ), a random-effects model showed a significant difference between the lymph node metastasis group (82.58%) and the non-metastasis group (58.86%) (OR = 5.14, 95% CI = (2.03, 13.01),  $p = 0.0005$ ) (Fig 4C).

**CD147 with differentiation of esophageal cancer tissues.** The association between CD147 and histological differentiation was investigated in ten studies [7, 15, 16, 18, 20, 23, 26, 28, 30, 31]. With significant heterogeneity ( $p = 0.0009$ ,  $I^2 = 68\%$ ), a random-effects model showed no difference between 234 poorly differentiated tissues (76.50%) and 471 moderately to well differentiated tissues (67.52%) (OR = 1.57, 95% CI = (0.79, 3.12),  $p = 0.19$ ) (Fig 4D).

**CD147 with age and sex of esophageal cancer tissues.** Seven [7, 9, 15, 16, 23, 26, 28] and eight studies [7, 9, 15, 16, 18, 23, 26, 28] reported the relationship of CD147 expression with age and sex, respectively. Heterogeneity was not observed in the analysis of CD147 expression with respect to age ( $p = 0.61$ ,  $I^2 = 0\%$ ) and sex ( $p = 0.62$ ,  $I^2 = 0\%$ ); therefore, a fixed-effect model was used. The results showed that CD147 was not associated with age (OR = 1.05, 95% CI = (0.72, 1.53),  $p = 0.79$ ) (Fig 4E) or sex (OR = 0.70, 95% CI = (0.47, 1.04),  $p = 0.07$ ) (Fig 4F).

## Sensitivity analysis and publication bias

A sensitivity analysis was performed to evaluate the stability of the results. As the survival analysis included fewer than three data sets, a different model was used for the sensitivity analysis, i.e., a random effect model. The results indicated stability, as shown in Table 2.

We excluded studies one-by-one for the sensitivity test for parameters with more than 3 data sets. The sensitivity analysis (S1 Fig and S2 File) showed that all parameters are stable, except for EC vs. hyperplastic tissues and poorly vs. middle to well differentiated states (Table 3). For publication bias, we used Begg's test (S2 Fig and S3 File). Only two parameters (EC vs. noncancerous and lymph node metastasis group) showed publication bias (Table 3). We then used a trim-and-fill method, as described in the Materials and Methods, after omitting studies with small sample sizes. The pooled analysis results were the same as the original results based on all studies.

## Discussion

CD147 is a 55-kDa molecule found on the surface of tumor cells. It can stimulate the expression of MMPs, which facilitate the invasiveness of cancer cells [17, 32]. The correlation between



A

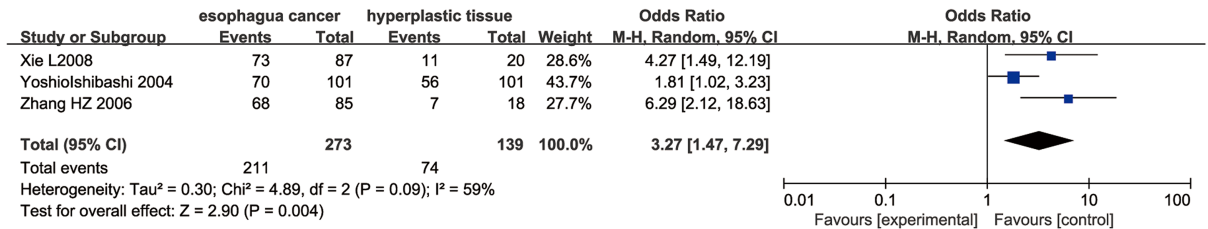

B

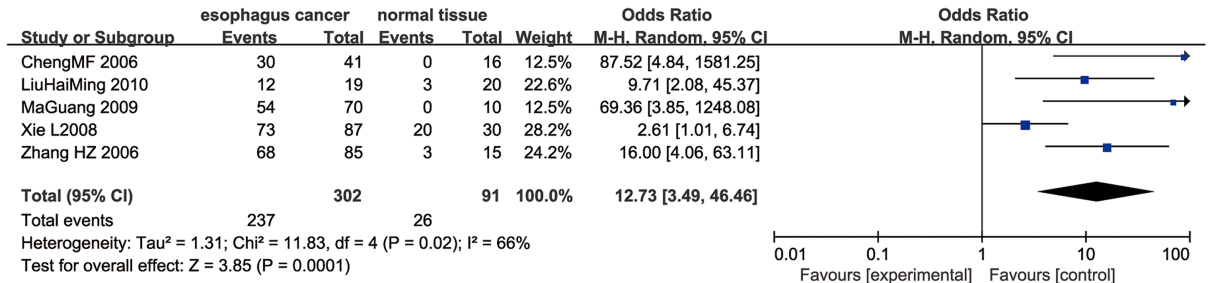

C

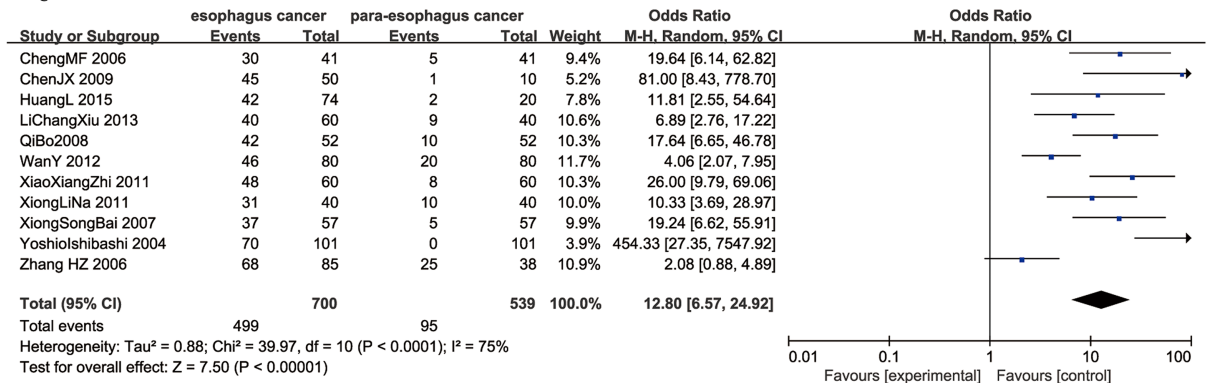

D

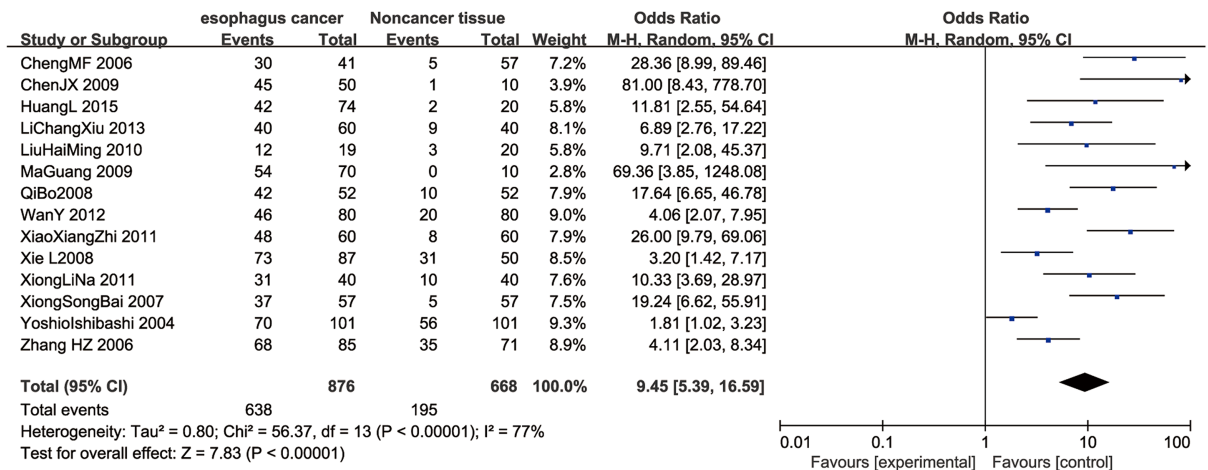

**Fig 3. Forest plots of CD147 expression and different tissues.** The squares and horizontal lines correspond to the study-specific OR and 95% CI. The area of the squares reflects the study-specific weight (inverse of the variance). The diamonds

represent the pooled OR and 95% CI. The solid vertical line is at the null value (OR = 1). **A** CD147 positive expression between cancer and noncancer tissues. Significant difference was found between cancer and noncancer tissues (OR = 9.45, 95%CI = (5.39, 16.59),  $p < 0.00001$ ). **B** CD147 positive expression between cancer and normal tissues. Significant difference was found between cancer and normal tissues (OR = 12.73, 95%CI = (3.49, 46.46),  $p = 0.0001$ ). **C** CD147 positive expression between cancer and para-carcinoma tissues. Significant difference was found between cancer and para-carcinoma tissues (OR = 12.80, 95%CI = (6.57, 24.92),  $p < 0.00001$ ). **D** CD147 positive expression between cancer and hyperplastic tissues. Significant difference was found between cancer and hyperplastic tissues (OR = 3.27, 95% CI = (1.47, 7.29),  $p = 0.004$ ).

<https://doi.org/10.1371/journal.pone.0180271.g003>

CD147 expression and EC has been investigated extensively. However, the clinical relevance of CD147 remains controversial. Sample size, as a strong predictor in epidemiological studies, may play an important role in resolving this controversy. In the current meta-analysis, we pooled data from 17 studies and demonstrated a remarkable association between CD147 expression and EC. We evaluated the association between CD147 in cancer and other tissues. Based on our results, we concluded that high CD147 expression was significantly associated with malignant tissues.

CD147 stimulates adjacent interstitial normal cells to produce MMPs[33]. MMPs are proteases known to degrade the ECM[34]. Thus, carcinoma cells can interact with adjacent normal cells to produce MMPs via CD147 on their surface, and, in turn, invade lymphatic tissue and blood vessels and penetrate the ECM to reach adjacent organs, with the help of MMPs. Tumor invasion and metastasis are a major barrier to cancer treatment and a main cause of death[35]. The basement membrane and ECM form a histological barrier that can prevent the progression of malignant tumors, and its degradation facilitates tumor progression.

Efforts were made to conduct a comprehensive analysis, but some limitations need to be acknowledged. First, despite our efforts, we did not obtain unpublished data; therefore, the data included in the analyses were from only published data. However, most of the parameters showed no publication bias according to Begg's test, with the exception of two indicators (EC vs. Noncancerous and lymph node metastasis). We obtained a stable result when studies with small sample sizes were removed. Second, only 4 studies[7, 9, 15, 17] including 341 patients reported survival data. Wan and Wu[15] and Zhu et al. [9] focused on overall survival and Ishibashi et al.[17] considered disease-free survival. Wan and Wu[15] and Huang et al.[7] reported impact of CD147 on the 3-year survival rate and 5-year survival rate. Accordingly, the small sample size is a limitation. Fortunately, we obtained stable results among models in a test of the sensitivity. Last, 16 studies reported an association between high CD147 expression and ESCC; therefore, our results were particularly representative of ESCC. Further studies of adenocarcinoma of the esophagus are required to verify these results. However, Huang et al.[7] also showed that high CD147 expression in Type II/III AEGs was significantly associated with cancer tissue types (esophageal cancer versus noncancerous tissues (OR = 11.81, 95%CI = (2.55, 54.64)), poor 3-year survival (OR = 4.05, 95% CI = (1.30, 12.58)), poor 5-year survival (OR = 4.00, 95% CI = (1.46, 10.95)), TNM stage (OR = 4.11, 95% CI = (1.52, 11.14)), lymph node metastasis (OR = 4.40, 95% CI = (1.64, 11.78)), and histological differentiation (OR = 3.30, 95% CI = (1.21, 9.00)). Furthermore, the sensitivity analysis showed that the study of Huang et al.[7] had no influence on the results.

To our knowledge, this meta-analysis is the first study to systematically estimate the association between CD147 expression and the risk of EC and its clinicopathological parameters. Early diagnosis and early treatment are fundamental approaches to improve prognosis[36]. Our results indicated that high CD147 was significantly associated with EC tissues, supporting the notion that CD147 could potentially be applied as a clinical marker for the early diagnosis of EC. We demonstrated that high CD147 expression strongly predicted a poorer TNM stage, invasion depth, lymph node metastasis, and a worse survival rate in patients with EC. In

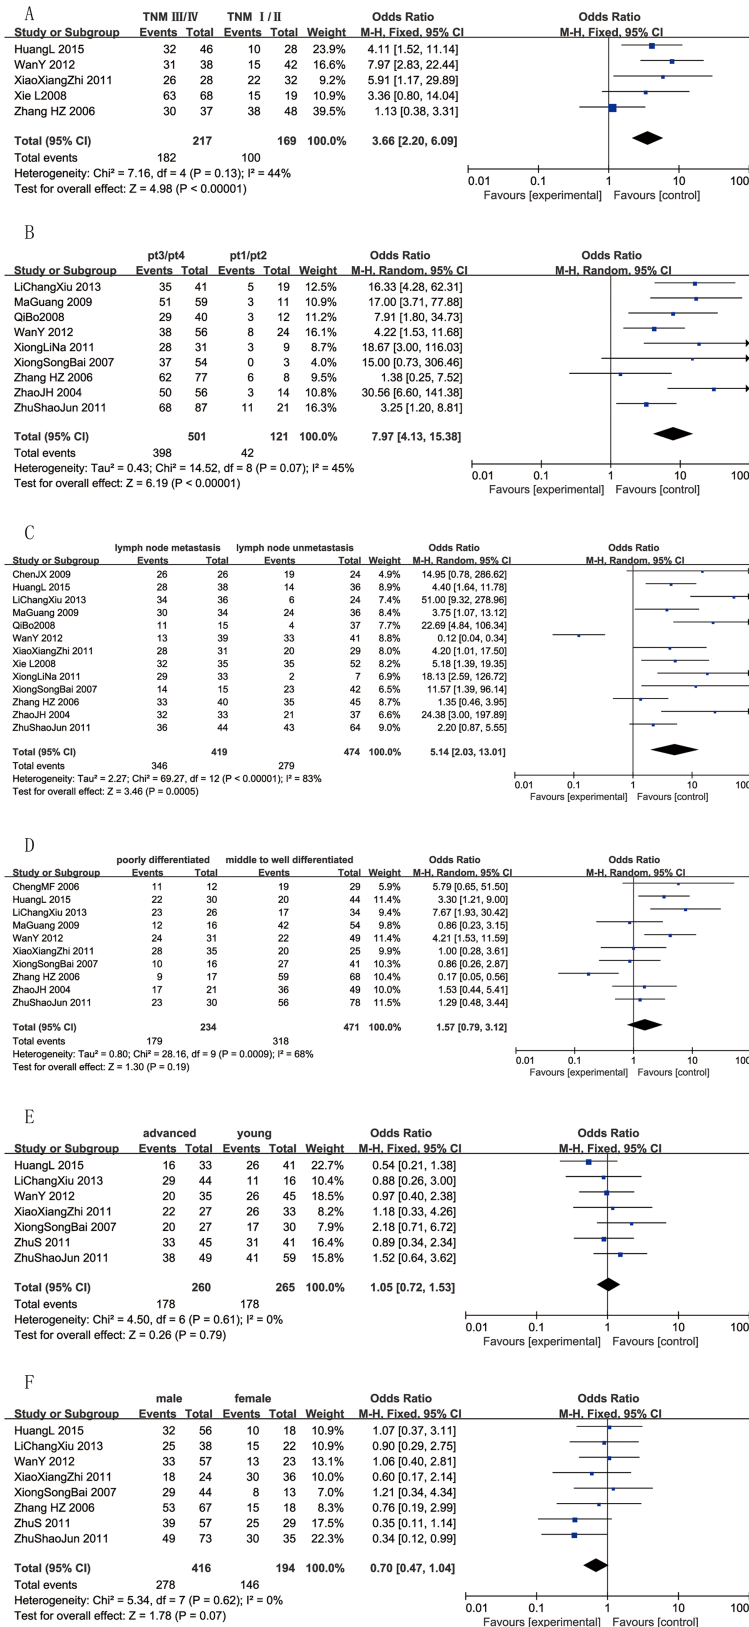

**Fig 4. Forest plots of CD147 expression and the clinicopathological features of patients with esophagus cancer.** The squares and horizontal lines correspond to the study- specific OR and 95% CI. The

area of the squares reflects the study-specific weight (inverse of the variance). The diamonds represent the pooled OR and 95% CI. The solid vertical line is at the null value (OR = 1). **A** The relationship between CD147 expression and TNM staging. CD147 expression was associated with TNM staging of esophagus cancer (OR = 3.66, 95%CI = (2.20, 6.09),  $p < 0.00001$ ). **B** The relationship between CD147 expression and tumor depth. CD147 expression was associated with tumor depth (OR = 7.97, 95%CI = (4.13, 15.38),  $p < 0.00001$ ). **C** The relationship between CD147 expression and status of lymph node. CD147 expression was associated with status of lymph node (OR = 5.14, 95%CI = (2.03, 13.01),  $p = 0.0005$ ). **D** The relationship between CD147 expression and tumor differentiation. CD147 expression wasn't associated with tumor differentiation (OR = 1.57, 95%CI = (0.79, 3.12),  $p = 0.19$ ). **E** The relationship between CD147 expression and age. CD147 expression wasn't associated with age (OR = 1.05, 95%CI = (0.72, 1.53),  $p = 0.79$ ). **F** The relationship between CD147 expression and sex. CD147 expression wasn't associated with sex (OR = 0.70, 95%CI = (0.47, 1.04),  $p = 0.07$ ).

<https://doi.org/10.1371/journal.pone.0180271.g004>

**Table 2. Summary of the sensitivity analysis of parameters with less than 3 data sets.**

|                      | Sample number | Fixed model                      | Random model                     | Heterogeneity                | Publication bias(p value) |
|----------------------|---------------|----------------------------------|----------------------------------|------------------------------|---------------------------|
| 3-year survival rate | 154           | OR = 3.26, 95% CI = (1.53, 6.93) | OR = 3.25, 95% CI = (1.52, 6.92) | $I^2 = 0.0\%$ , $p = 0.606$  | 1.000                     |
| 5-year survival rate | 154           | OR = 4.35, 95% CI = (2.13, 8.90) | OR = 4.35, 95% CI = (2.13, 8.90) | $I^2 = 0.0\%$ , $p = 0.814$  | 1.000                     |
| Overall survival     | 166           | HR = 1.60, 95% CI = (1.19, 2.15) | HR = 1.71, 95% CI = (1.06, 2.77) | $I^2 = 30.1\%$ , $p = 0.233$ | 1.000                     |

<https://doi.org/10.1371/journal.pone.0180271.t002>

**Table 3. Summary of sensitivity analysis of parameters with more than 2 data sets.**

|                                                                 | OR Fluctuation | 95%CI Fluctuation | Publication bias (p value) |
|-----------------------------------------------------------------|----------------|-------------------|----------------------------|
| <b>CD 147 Expression among different tissue</b>                 |                |                   |                            |
| EC VS noncancer                                                 | 8.55~10.73     | 4.87~19.43        | 0.024                      |
| EC vs normal tissue                                             | 9.27~18.43     | 2.37~90.29        | 1.000                      |
| EC vs para-EC                                                   | 10.82~15.24    | 5.83~30.30        | 0.074                      |
| EC vs hyperplastic tissue                                       | 2.48~5.14      | 0.93~10.95        | 0.296                      |
| <b>CD 147 Expression with clinicopathologic characteristics</b> |                |                   |                            |
| TNM I/II vs TNM III/IV                                          | 2.80~5.31      | 1.94~9.59         | 1.000                      |
| pt3/pt4 VS pt1/pt2                                              | 6.64~9.46      | 3.54~19.26        | 0.536                      |
| LNM vs LNUM                                                     | 4.22~6.50      | 1.74~16.32        | 0.016                      |
| Poorly vs middle to well differentiated                         | 1.33~2.01      | 0.67~3.55         | 0.721                      |
| Advance VS Young                                                | 0.95~1.08      | 0.63~1.82         | 1.000                      |
| Male vs Female                                                  | 0.64~0.80      | 0.41~1.18         | 0.902                      |

Note:  $p < 0.05$ , exist Publication Bias; EC means esophagus cancer; LNM means lymph node metastasis; LNUM means lymph node unmetastasis.

<https://doi.org/10.1371/journal.pone.0180271.t003>

conclusion, CD147 was an important molecule for the diagnosis and estimating the prognosis of patients with EC. Further studies using additional putative EC surface markers in combination with CD147 are required to evaluate their potential use in predicting patient outcomes.

## Supporting information

**S1 Table. NOS score.**  
(DOCX)

**S1 File. Searching strategy.**  
(DOCX)

**S2 File. Sensitivity analysis plot legend.**  
(DOCX)

**S3 File. Begg's plot legend.**  
(DOCX)

**S4 File. PRISMA 2009 checklist.**  
(DOC)

**S1 Fig. Sensitivity analysis plot.**  
(TIF)

**S2 Fig. Begg's plot.**  
(TIF)

## Author Contributions

**Conceptualization:** Hui Li, Chunxiang Jiang.

**Data curation:** Hui Li, Chunxiang Jiang, Dongwen Wu, Shupeng Shi, Mengting Liao, Jing Wang, Yanwen Li, Zihao Xu.

**Formal analysis:** Hui Li, Chunxiang Jiang, Dongwen Wu, Shupeng Shi, Yanwen Li.

**Investigation:** Hui Li.

**Methodology:** Hui Li, Dongwen Wu.

**Project administration:** Hui Li.

**Software:** Hui Li, Chunxiang Jiang, Dongwen Wu.

**Supervision:** Hui Li.

**Writing – original draft:** Hui Li, Chunxiang Jiang.

**Writing – review & editing:** Hui Li.

## References

1. Siegel R, Ma JM and Zou ZH. et al. Cancer Statistics, 2014. *Ca Cancer J Clin.* 2014; 64(1)–21.
2. Tang WR, Fang JY, Wu KS, Shi XJ, Luo JY and Lin K. Epidemiological characteristics and prediction of esophageal cancer mortality in China from 1991 to 2012. *Asian Pac J Cancer Prev.* 2014; 15(16):6929–34. PMID: [25169548](https://pubmed.ncbi.nlm.nih.gov/25169548/)
3. Jiang L, Zhao X, Meng X and Yu J. Involved field irradiation for the treatment of esophageal cancer: is it better than elective nodal irradiation? *CANCER LETT.* 2015; 357(1):69–74. <https://doi.org/10.1016/j.canlet.2014.11.045> PMID: [25464112](https://pubmed.ncbi.nlm.nih.gov/25464112/)
4. Abdel-Latif MM, Kelleher D and Reynolds JV. Molecular mechanisms of constitutive and inducible NF-kappaB activation in oesophageal adenocarcinoma. *EUR J CANCER.* 2015; 51(4):464–72. <https://doi.org/10.1016/j.ejca.2014.11.014> PMID: [25596807](https://pubmed.ncbi.nlm.nih.gov/25596807/)
5. Zhang L, Ye SB, Ma G, Tang XF, Chen SP, He J, Liu WL, Xie D, Zeng YX and Li J. The expressions of MIF and CXCR4 protein in tumor microenvironment are adverse prognostic factors in patients with esophageal squamous cell carcinoma. *J TRANSL MED.* 2013; 11(60). <https://doi.org/10.1186/1479-5876-11-60> PMID: [23497377](https://pubmed.ncbi.nlm.nih.gov/23497377/)
6. Wang CY, Deng JY, Cai XW, Fu XL, Li Y, Zhou XY, Wu XH, Hu XC, Fan M, Xiang JQ, Zhang YW, Chen HQ, Perez R, Jiang GL and Zhao KL. High EGFR and low p-Akt expression is associated with better outcome after nimotuzumab-containing treatment in esophageal cancer patients: preliminary clinical result and testable hypothesis. *ONCOTARGET.* 2015; 6(21):18674–82. <https://doi.org/10.18632/oncotarget.4367> PMID: [26124180](https://pubmed.ncbi.nlm.nih.gov/26124180/)

7. Huang L, Xu AMandPeng Q. CD147 and MMP-9 expressions in type II/III adenocarcinoma of esophago-gastric junction and their clinicopathological significances. *Int J Clin Exp Pathol*. 2015; 8(2):1929–37. PMID: [25973085](https://pubmed.ncbi.nlm.nih.gov/25973085/)
8. Peng F, Li H, Ning Z, Yang Z, Li H, Wang Y, Chen FandWu Y. CD147 and Prostate Cancer: A Systematic Review and Meta-Analysis. *PLOS ONE*. 2016; 11(9):e163678. <https://doi.org/10.1371/journal.pone.0163678> PMID: [27684938](https://pubmed.ncbi.nlm.nih.gov/27684938/)
9. Zhu S, Li Y, Mi L, Zhang Y, Zhang L, Gong L, Han X, Yao L, Lan M, Chen ZandZhang W. Clinical impact of HAb18G/CD147 expression in esophageal squamous cell carcinoma. *Dig Dis Sci*. 2011; 56(12):3569–76. <https://doi.org/10.1007/s10620-011-1812-x> PMID: [21789540](https://pubmed.ncbi.nlm.nih.gov/21789540/)
10. Hemdan T, Malmstrom PU, Jahnson SandSegersten U. Emmprin Expression Predicts Response and Survival following Cisplatin Containing Chemotherapy for Bladder Cancer: A Validation Study. *J Urol*. 2015; 194(6):1575–81. <https://doi.org/10.1016/j.juro.2015.06.085> PMID: [26119672](https://pubmed.ncbi.nlm.nih.gov/26119672/)
11. Zhao J, Ye W, Wu J, Liu L, Yang L, Gao L, Chen B, Zhang F, Yang HandLi Y. Sp1-CD147 positive feedback loop promotes the invasion ability of ovarian cancer. *ONCOL REP*. 2015; 34(1):67–76. <https://doi.org/10.3892/or.2015.3999> PMID: [25998266](https://pubmed.ncbi.nlm.nih.gov/25998266/)
12. Wang Q, Zhang JGandWang W. Expression and significance of S100P, CD147, and OCT4 in different prostate cancer tissue TNM stages. *GENET MOL RES*. 2015; 14(2):6844–51. <https://doi.org/10.4238/2015.June.18.27> PMID: [26125892](https://pubmed.ncbi.nlm.nih.gov/26125892/)
13. Li H, Wu D, Shi S, Xu Y, Wei L, Liu JandLiu Y. Expression and clinical significance of CD147 in renal cell carcinoma: a meta-analysis. *ONCOTARGET*. 2017; <https://doi.org/10.18632/oncotarget.17376> PMID: [28488587](https://pubmed.ncbi.nlm.nih.gov/28488587/)
14. Li H, Xi Z, Dai X, Wu W, Li Y, Liu YandZhang H. CD147 and glioma: a meta-analysis. *J Neurooncol*. 2017; <https://doi.org/10.1007/s11060-017-2499-4> PMID: [28560663](https://pubmed.ncbi.nlm.nih.gov/28560663/)
15. Wan YandWu XY. [Expression and clinical significance of DAPK1 and CD147 in esophageal squamous cell carcinoma]. *Zhonghua Zhong Liu Za Zhi*. 2012; 34(1):44–8. PMID: [22490855](https://pubmed.ncbi.nlm.nih.gov/22490855/)
16. Zhu S, Mi L, Li Y, Zhang Y, Gong L, Han X, Yao L, LAN MandZhang W. Significance and expression of HAb18G/CD147 in esophageal squamous cell carcinoma. *CHINESE JOURNAL OF CELLULAR AND MOLECULAR IMMUNOLOGY*. 2011; 07:784–6.
17. Ishibashi Y, Matsumoto T, Niwa M, Suzuki Y, Omura N, Hanyu N, Nakada K, Yanaga K, Yamada K, Ohkawa K, Kawakami MandUrashima M. CD147 and matrix metalloproteinase-2 protein expression as significant prognostic factors in esophageal squamous cell carcinoma. *CANCER-AM CANCER SOC*. 2004; 101(9):1994–2000. <https://doi.org/10.1002/cncr.20593> PMID: [15372476](https://pubmed.ncbi.nlm.nih.gov/15372476/)
18. Zhang H, Li H, Hua P, Wang H, Yi P, Liu JandWu D. Expression and clinical significance of extracellular matrix metalloproteinase inducer in squamous cellular carcinoma of esophagus. *CHINESE JOURNAL OF EXPERIMENTAL SURGERY*. 2006; 10:1248–50.
19. Li-na XandZhi-fan X. Significance and expression of CD147 and nuclear factor- $\kappa$ B and epithelial growth factor receptor in esophageal squamous cell carcinoma. *CLINICAL FOCUS*. 2011; 01:20–2.
20. Guang MA, Zhian GandYuhua Z. Significance of Expressions of CD147, MMP-2 and VEGF in Esophageal Squamous Cell Carcinoma. *Journal of New Medicine*. 2009; 19(1):12–5. <https://doi.org/10.3969/j.issn.1004-5511.2009.01.004>
21. Wells G A, Shea B, O Connell D, Peterson J E A, Welch VandEA Losos M. the Newcastle-Ottawa Scale (NOS) for assessing the quality of nonrandomised studies in meta-analyses.; 2000.
22. Duval SandTweedie R. Trim and fill: A simple funnel-plot-based method of testing and adjusting for publication bias in meta-analysis. *BIOMETRICS*. 2000; 56(2):455–63. PMID: [10877304](https://pubmed.ncbi.nlm.nih.gov/10877304/)
23. Xiao X. The clinical research on the relationship between the expression of cd147 and mmp-2 with biological behavior in esophgeal cancer. Taishan Medical University. 2011; 05):58.
24. Haiming LandJunfeng D. The Expression of CD147 and MMP-2 in Human Early Esophageal Carcinoma. *CHINA FOREIGN MEDICAL TREATMENT*. 2010; 29):3–5.
25. Jin-xu C, Ke-jun CandYue-xin C. Relationship between Metastasis of Esophageal Squamous Cell Carcinoma and Expression of CD147, MMP9 and S100A4. *CANCER RESEARCH ON PREVENTION AND TREATMENT*. 2009; 07):596–9.
26. Chang-xiu LI, Hong-mei XU, Da-rong Y, Liu Y, Shi-jun WU, Li ZandZhi-bin L. The expressions of CD147,PTEN and E-cadherin in esophageal carcinoma and their correlation with clinical-pathological characteristics. *LABORATORY MEDICINE AND CLINIC*. 2013; 10(2):129–31. <https://doi.org/10.3969/j.issn.1672-9455.2013.02.001>
27. B Q, Shi Q, Liu SandZhao B. Expression of matrix metalloproteinase-9,tissue inhibitor of metalloproteinase-1 and CD147 in esophageal squamous cell cancer. *MEDICAL INFORMATION SECTION OF OPERATIVE SURGERY*. 2008; 10):886–8.

28. Song-bai X, Yi X, Bing J, Xiao-xing Z and Kang Y. Expression of Matrix Metalloproteinases -9 and CD-147 in Human Esophageal Squamous Cell Carcinoma. *PROGRESS IN MODERN BIOMEDICINE*. 2007; 01):42–3.
29. Ling X, Zhi-dong P, Dong-ping M, Qi X, Yong-hu L, Zhi-jun C and Tie-jun R. Expression of fibronectin, laminin and extracellular matrix metalloproteinase inducer in esophageal Carcinoma. *JOURNAL OF INTERNATIONAL ONCOLOGY*. 2008; 35(2):156–9. <https://doi.org/10.3760/cma.j.issn.1673-422X.2008.02.025>
30. Cheng MF, Tzao C, Tsai WC, Lee WH, Chen A, Chiang H, Sheu LF and Jin JS. Expression of EMMPRIN and matrilysin in esophageal squamous cell carcinoma: correlation with clinicopathological parameters. *DIS ESOPHAGUS*. 2006; 19(6):482–6. <https://doi.org/10.1111/j.1442-2050.2006.00613.x> PMID: 17069593
31. Zhao J and Fan K. Expression and Significance of Matrix Metalloproteinase-2 and CD147 in Esophageal Squamous Cell Carcinoma. *ACTA UNIVERSITATIS MEDICINALIS NANJING(NATURAL SCIENCE)*. 2004; 06):621–3.
32. Reimers N, Zafrakas K, Assmann V, Egen C, Riethdorf L, Riethdorf S, Berger J, Ebel S, Janicke F, Sauter G and Pantel K. Expression of extracellular matrix metalloproteinases inducer on micrometastatic and primary mammary carcinoma cells. *CLIN CANCER RES*. 2004; 10(10):3422–8. <https://doi.org/10.1158/1078-0432.CCR-03-0610> PMID: 15161697
33. Ellis SM, Nabeshima K and Biswas C. Monoclonal antibody preparation and purification of a tumor cell collagenase-stimulatory factor. *CANCER RES*. 1989; 49(12):3385–91. PMID: 2541902
34. Basset P, Bellocq JP, Wolf C, Stoll I, Hutin P, Limacher JM, Podhajcer OL, Chenard MP, Rio MC and Chambon P. A novel metalloproteinase gene specifically expressed in stromal cells of breast carcinomas. *NATURE*. 1990; 348(6303):699–704. <https://doi.org/10.1038/348699a0> PMID: 1701851
35. Gilkes DM, Semenza GL and Wirtz D. Hypoxia and the extracellular matrix: drivers of tumour metastasis. *NAT REV CANCER*. 2014; 14(6):430–9. <https://doi.org/10.1038/nrc3726> PMID: 24827502
36. Huang L, Xu A, Li T, Han W, Wu S and Wang Y. Detection of perioperative cancer antigen 72–4 in gastric juice pre- and post-distal gastrectomy and its significances. *MED ONCOL*. 2013; 30(3):651. <https://doi.org/10.1007/s12032-013-0651-3> PMID: 23820956
